# Supplementary material for: Improved specific capacity and cycling stability of organic cocrystal lithium-ion batteries through charge transfer
Source: Royal Society of Chemistry journal article supplement (doi:10.1039/d4ce01280a), 2025-01-01
Supplement: d4ce01280a1.pdf [file d4ce01280a1.pdf]

## Supporting Information

# Improved Specific Capacity and Cycle Stability of Organic Cocrystal Lithium-ion Batteries through Charge Transfer

*Xudong Fan<sup>a</sup>, Huibo Zhang<sup>a</sup>, Kang Li<sup>a</sup>, Zhongxin Dong<sup>a</sup>, Jie Huang<sup>b</sup>, Feng Teng<sup>a</sup>, Haibo Fan<sup>a</sup>,  
Hui Jiang<sup>\*c</sup>, Xuexia He<sup>\*b</sup>, Peng Hu<sup>\*a</sup>*

*<sup>a</sup>School of Physics, Northwest University, 710127, Xi'an, China*

*<sup>b</sup>School of Materials Science and Engineering, Shaanxi Normal University, 710119, Xi'an, China*

*<sup>c</sup>School of Materials Science and Engineering, Tianjin University, Tianjin 300072, P.R. China*

## Contents

**Figure S1.** CV curves at a scan rate of  $0.1 \text{ mV s}^{-1}$  of (a) pyrene-FA, (b) BAA-FA, (c) chrysene-FA and (d) perylene-FA.

**Figure S2.** Nyquist plots of (a) pyrene-FA, FA and pyrene, (b) BAA-FA, FA and BAA, (c) chrysene-FA, FA and chrysene, and (d) perylene-FA, FA and perylene.

**Figure S3.** Reversible capacities cycled at various rates of (a)-(d) pyrene-FA, BAA-FA, chrysene-FA and perylene-FA.

**Figure S4.** Cycling performance of at  $1 \text{ A g}^{-1}$  of (a) BAA-FA, (b) chrysene-FA and (c) perylene-FA.

**Figure S5.** SEM images of pyrene-FA (a) initial materials, (b) after 2000 cycles at  $1 \text{ A g}^{-1}$ .

**Figure S6.** Pseudocapacitive contribution rate of pyrene-FA at different scanning speeds.

**Figure S7.** (a) CV plots of FA at different voltage scanning rates, (b) the value of b (slope) at different peak currents in the CV of FA after linear fitting.

**Figure S8.** Pseudocapacitive contribution rate of FA at different scanning speeds.

**Table S1.** Comparison of battery performance among different cocrystals.

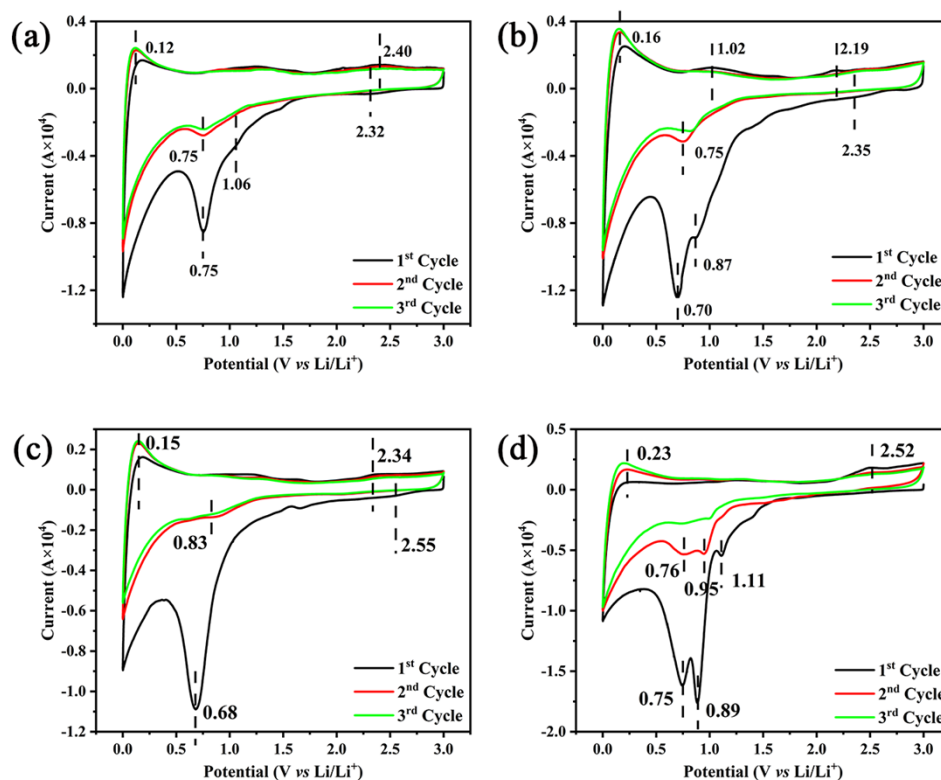

**Figure S1.** CV curves at a scan rate of  $0.1 \text{ mV s}^{-1}$  of (a) pyrene-FA, (b) BAA-FA, (c) chrysene-FA and (d) perylene-FA.

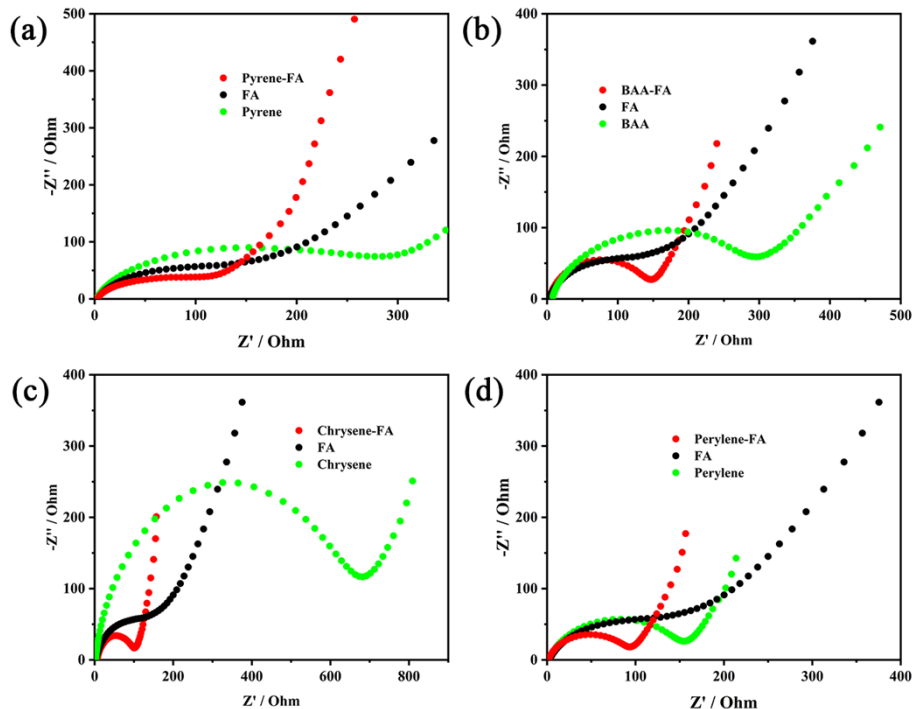

**Figure S2.** Nyquist plots of (a) pyrene-FA, FA and pyrene, (b) BAA-FA, FA and BAA, (c) chrysene-FA, FA and chrysene, and (d) perylene-FA, FA and perylene.

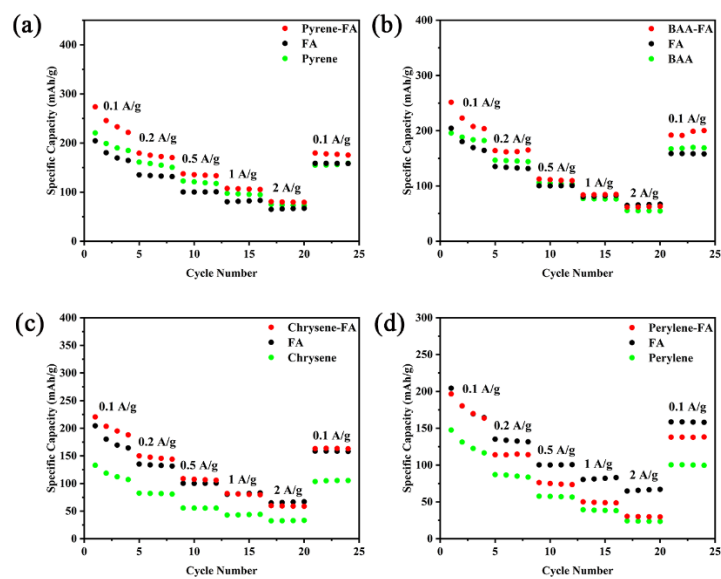

**Figure S3.** Reversible capacities cycled at various rates of (a)-(d) pyrene-FA, BAA-FA, chrysene-FA and perylene-FA.

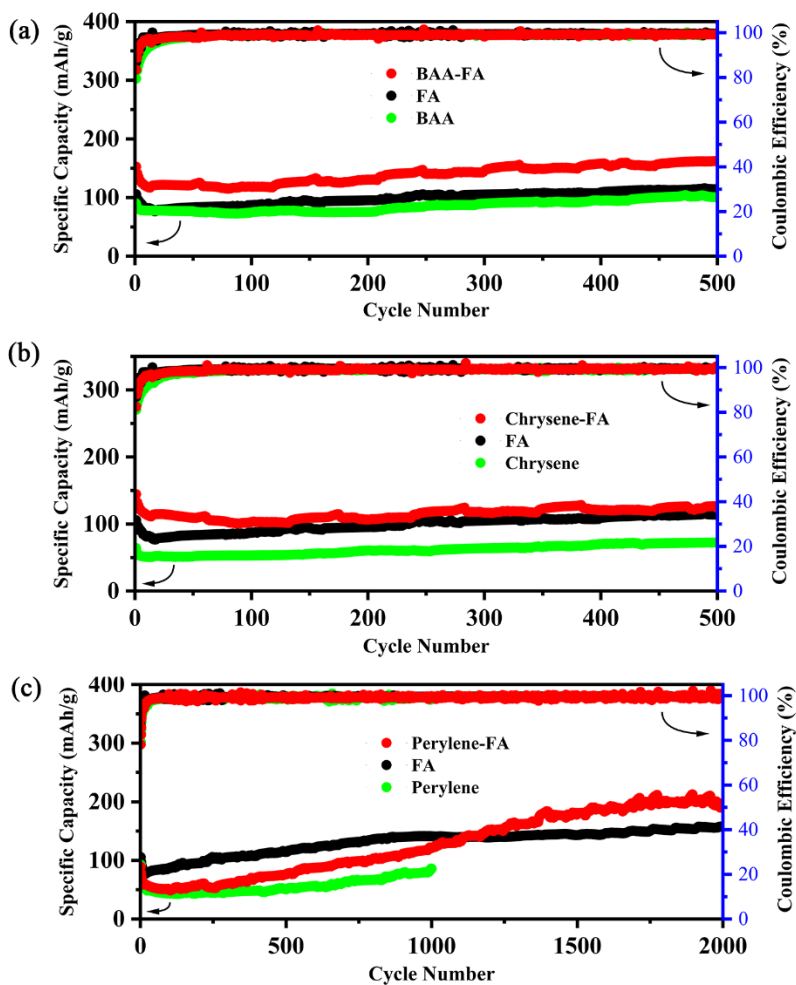

**Figure S4.** Cycling performance of at 1 A g<sup>-1</sup> of (a) BAA-FA, (b) chrysene-FA and (c) perylene-FA.

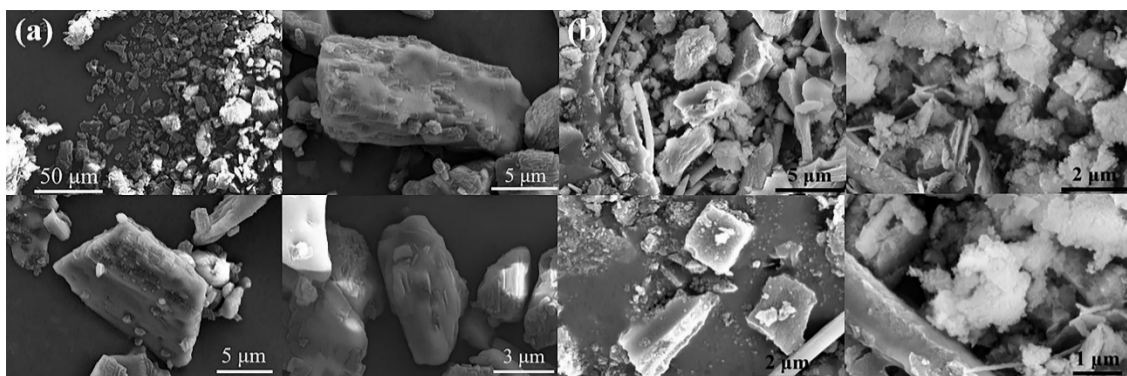

**Figure S5.** SEM images of pyrene-FA (a) initial materials, (b) after 2000 cycles at 1 A g<sup>-1</sup>.

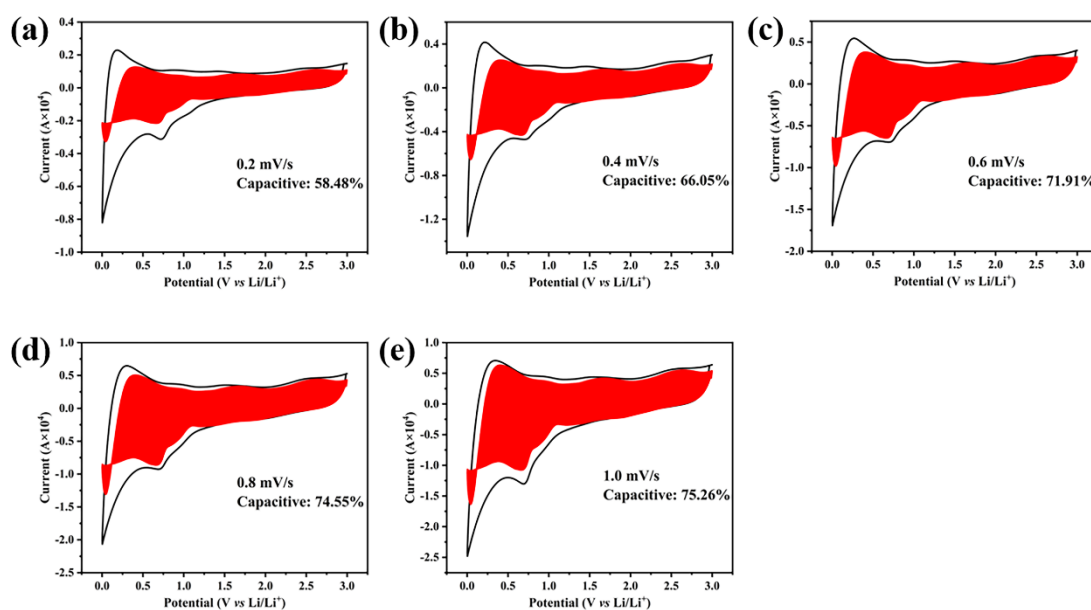

**Figure S6.** Pseudocapacitive contribution rate of pyrene-FA at different scanning speeds.

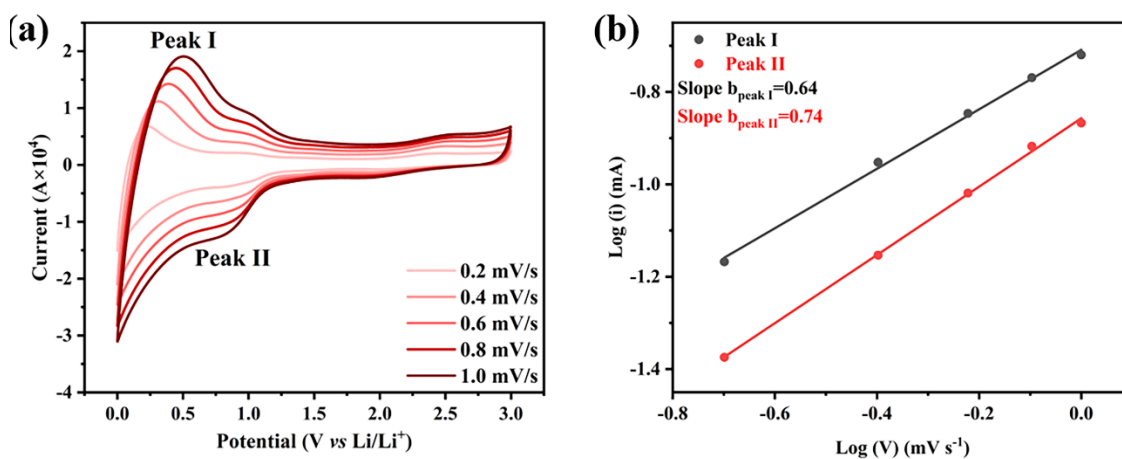

**Figure S7.** (a) CV plots of FA at different voltage scanning rates, (b) the value of  $b$  (slope) at different peak currents in the CV of FA after linear fitting.

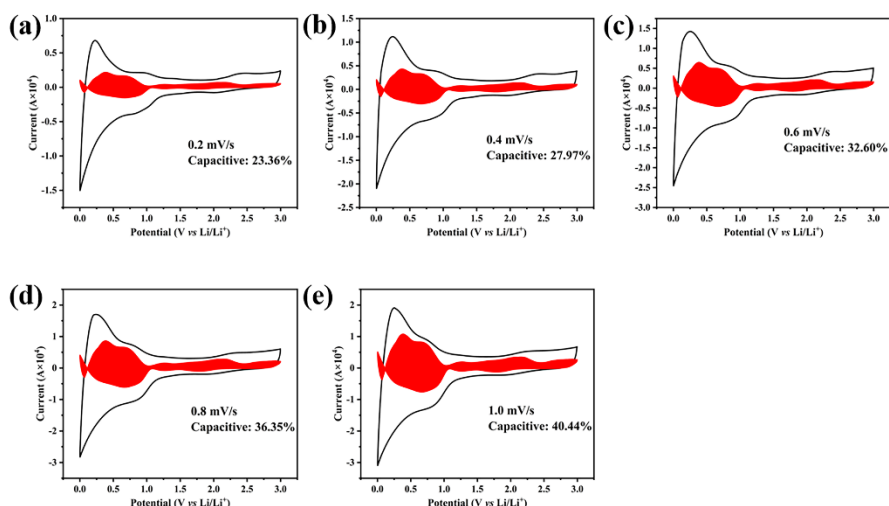

**Figure S8.** Pseudocapacitive contribution rate of FA at different scanning speeds.

**Table S1.** Comparison of battery performance among different cocrystals.

| Cocrystal                                                          | Initial capacity                                      | Cycling stability   | Refs.     |
|--------------------------------------------------------------------|-------------------------------------------------------|---------------------|-----------|
| Coronene-HAT-CN                                                    | 163.6 mAh g <sup>-1</sup> at<br>0.1 A g <sup>-1</sup> | 17.4% at 100 cycles | 1         |
| Pyrene-HAT-CN                                                      | 28.7 mAh g <sup>-1</sup> at<br>0.1 A g <sup>-1</sup>  | 35% at 100 cycles   | 1         |
| Carbazole-HAT-CN                                                   | 36.4 mAh g <sup>-1</sup> at<br>0.1 A g <sup>-1</sup>  | 69% at 100 cycles   | 1         |
| Corone-methyl-NDI                                                  | 230 mAh g <sup>-1</sup> at<br>0.5 A g <sup>-1</sup>   | 65% at 600 cycles   | 2         |
| Corone-propyl-DNI                                                  | 90 mAh g <sup>-1</sup> at<br>0.5 A g <sup>-1</sup>    | 20% at 100 cycles   | 2         |
| PNZ-TCNQ                                                           | 98 mAh g <sup>-1</sup> at<br>0.5 A g <sup>-1</sup>    | 73% at 50 cycles    | 3         |
| DD-TCNQ                                                            | 171 mAh g <sup>-1</sup> at<br>0.05 A g <sup>-1</sup>  | 60% at 10 cycles    | 3         |
| Li <sub>4</sub> C <sub>8</sub> H <sub>2</sub> O <sub>6</sub> -TCNQ | 172 mAh g <sup>-1</sup> at<br>0.5 C                   | 58% at 100 cycles   | 4         |
| Pyrene-FA                                                          | 275 mAh g <sup>-1</sup> at<br>0.1 A g <sup>-1</sup>   | 75% at 300 cycles   | This work |
| Pyrene-FA                                                          | 250 mAh g <sup>-1</sup> at<br>1900 cycles             | 80% at 4500 cycles  | This work |

## REFERENCES

1. K. Nakao, Y. Kamakura, M. Fujiwara, T. Shimizu, Y. Yoshida, H. Kitagawa, H. Yoshikawa, Y. Kitagawa and D. Tanaka, *Cryst. Growth Des.*, 2021, **22**, 26-31.
2. Z. Zheng, Z. Ju, S. Ma, Z. Liu, W. Xiang, J. Chen, B. Yang, Z. Mu, J. Zhang, P. Li and P. Sheng, *New J. Chem.*, 2023, **47**, 7476-7480.
3. S. Lee, J. Hong, S.-K. Jung, K. Ku, G. Kwon, W. M. Seong, H. Kim, G. Yoon, I. Kang, K. Hong, H. W. Jang and K. Kang, *Energy Storage Mater.*, 2019, **20**, 462-469.
4. F. Song, Z. Wang, T. Ma, L. Chen, H. Li and F. Wu, *Nano Energy*, 2023, **117**, 108893.
